# Supplementary material
Source: Springer Nature journal article supplement (https://www.springermedizin.de/resource/supplementary/12885_2004_155_MOESM8_ESM.pdf/9469030)
Supplement: MOESM8 [file 9469030]

|           | Grade I (14) | Grade II (15) | Grade III (12) | Grade IV (12) | Total cases (53) | Normal Tissue (3) |
|-----------|--------------|---------------|----------------|---------------|------------------|-------------------|
| RASSF1A   | 71.43(10)    | 80.00(12)     | 66.67(8)       | 58.33(7)      | 69.81(37)        | 0.00(0)           |
| p73       | 50.00(7)     | 33.33(5)      | 50.00(6)       | 58.33(7)      | 47.17(25)        | 0.00(0)           |
| AR        | 50.00(7)     | 53.33(8)      | 33.33(4)       | 25.00(3)      | 41.51(22)        | 33.33(1)*         |
| MGMT      | 21.43(3)     | 40.00(6)      | 41.67(5)       | 41.67(5)      | 35.85(19)        | 0.00(0)           |
| CDH1      | 35.71(5)     | 20.00(3)      | 41.67(5)       | 33.33(4)      | 32.08(17)        | 0.00(0)           |
| OCT6      | 21.43(3)     | 20.00(4)      | 33.33(4)       | 50.00(6)      | 30.19(16)        | 0.00(0)           |
| MT1A      | 21.43(3)     | 33.33(5)      | 25.00(3)       | 41.67(5)      | 30.19(16)        | 0.00(0)           |
| WT1       | 35.71(5)     | 33.33(5)      | 25.00(3)       | 25.00(3)      | 30.19(16)        | 0.00(0)           |
| IRF7      | 28.57(4)     | 33.33(5)      | 16.67(2)       | 25.00(3)      | 26.42(14)        | 0.00(0)           |
| CDH13     | 0.00(0)      | 0.00(0)       | 16.67(2)       | 8.33(1)       | 5.66(3)          | 0.00(0)           |
| cyclin a1 | 7.14(1)      | 0.00(0)       | 8.33(1)        | 8.33(1)       | 5.66(3)          | 0.00(0)           |
| DBCCR1    | 0.00(0)      | 0.00(0)       | 8.33(1)        | 0.00(0)       | 1.89(1)          | 0.00(0)           |
| EPO       | 0.00(0)      | 0.00(0)       | 8.33(1)        | 0.00(0)       | 1.89(1)          | 0.00(0)           |
| MYOD1     | 0.00(0)      | 0.00(0)       | 0.00(0)        | 8.33(1)       | 1.89(1)          | 0.00(0)           |
| p16INK4a  | 0.00(0)      | 0.00(0)       | 0.00(0)        | 8.33(1)       | 1.89(1)          | 0.00(0)           |
| ABL       | 0.00(0)      | 0.00(0)       | 0.00(0)        | 0.00(0)       | 0.00(0)          | 0.00(0)           |
| APAF1     | 0.00(0)      | 0.00(0)       | 0.00(0)        | 0.00(0)       | 0.00(0)          | 0.00(0)           |
| APC       | 0.00(0)      | 0.00(0)       | 0.00(0)        | 0.00(0)       | 0.00(0)          | 0.00(0)           |
| BRCA1     | 0.00(0)      | 0.00(0)       | 0.00(0)        | 0.00(0)       | 0.00(0)          | 0.00(0)           |
| CAV       | 0.00(0)      | 0.00(0)       | 0.00(0)        | 0.00(0)       | 0.00(0)          | 0.00(0)           |
| CSPG2     | 0.00(0)      | 0.00(0)       | 0.00(0)        | 0.00(0)       | 0.00(0)          | 0.00(0)           |
| DAPK1     | 0.00(0)      | 0.00(0)       | 0.00(0)        | 0.00(0)       | 0.00(0)          | 0.00(0)           |
| hMLH1     | 0.00(0)      | 0.00(0)       | 0.00(0)        | 0.00(0)       | 0.00(0)          | 0.00(0)           |
| LKB1      | 0.00(0)      | 0.00(0)       | 0.00(0)        | 0.00(0)       | 0.00(0)          | 0.00(0)           |
| p14ARF    | 0.00(0)      | 0.00(0)       | 0.00(0)        | 0.00(0)       | 0.00(0)          | 0.00(0)           |
| p15INK4b  | 0.00(0)      | 0.00(0)       | 0.00(0)        | 0.00(0)       | 0.00(0)          | 0.00(0)           |
| p27KIP1   | 0.00(0)      | 0.00(0)       | 0.00(0)        | 0.00(0)       | 0.00(0)          | 0.00(0)           |
| p57KIP2   | 0.00(0)      | 0.00(0)       | 0.00(0)        | 0.00(0)       | 0.00(0)          | 0.00(0)           |
| PTEN      | 0.00(0)      | 0.00(0)       | 0.00(0)        | 0.00(0)       | 0.00(0)          | 0.00(0)           |
| RASSF1C   | 0.00(0)      | 0.00(0)       | 0.00(0)        | 0.00(0)       | 0.00(0)          | 0.00(0)           |
| RB1       | 0.00(0)      | 0.00(0)       | 0.00(0)        | 0.00(0)       | 0.00(0)          | 0.00(0)           |
| SURVIVIN  | 0.00(0)      | 0.00(0)       | 0.00(0)        | 0.00(0)       | 0.00(0)          | 0.00(0)           |
| VHL       | 0.00(0)      | 0.00(0)       | 0.00(0)        | 0.00(0)       | 0.00(0)          | 0.00(0)           |
| MAGEA1    | 35.71(5)     | 13.33(2)      | 25.00(3)       | 25.00(3)      | 24.53(13)        | 100(3)**          |
